# Supplementary material for: MCL attenuates atherosclerosis by suppressing macrophage ferroptosis via targeting KEAP1/NRF2 interaction
Source: PubMed Central journal article supplement (PMC10761782; doi:10.1016/j.redox.2023.102987), 2023-12-07
Supplement: mmc2.pdf [file mmc2.pdf]

**Figure 2C**

**GPX4**

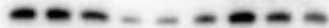

**xCT**

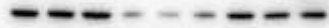

**$\beta$ -actin**

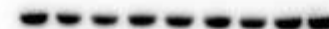

**Figure 3I**

**GPX4**

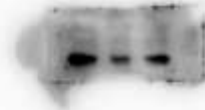

**xCT**

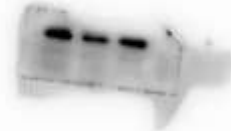

**$\beta$ -actin**

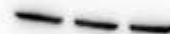

**Figure 5A**

**NRF2**

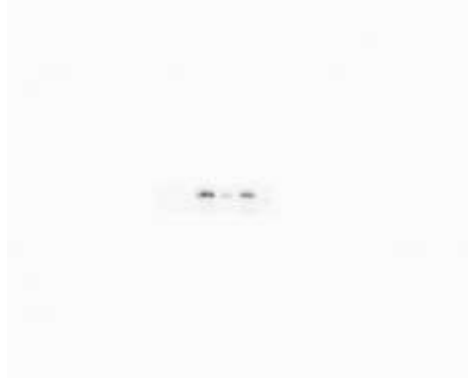

**Histone H3**

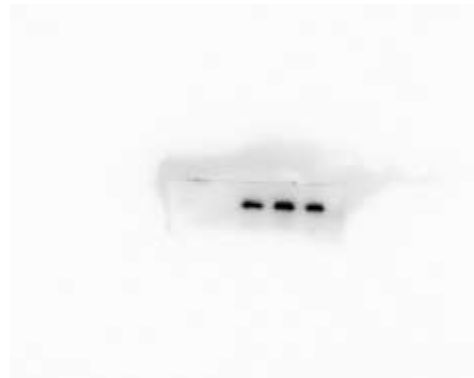

**NRF2**

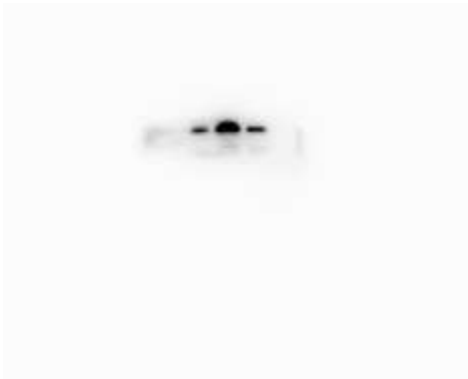

**$\beta$ -actin**

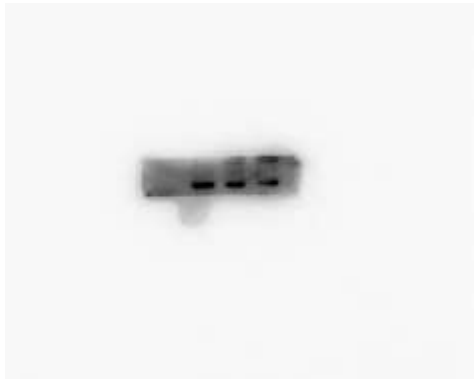

**Figure 5E**

**NRF2**

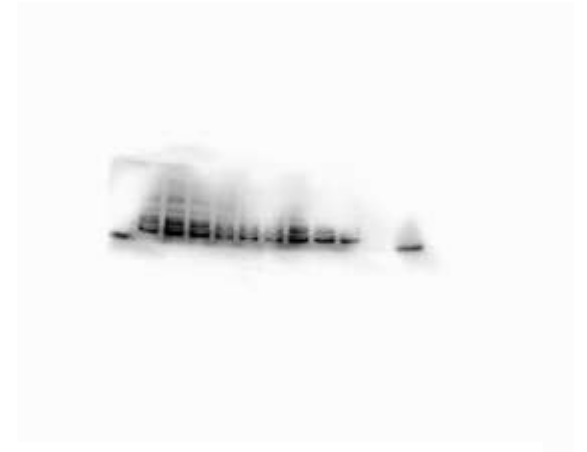

**Histone H3**

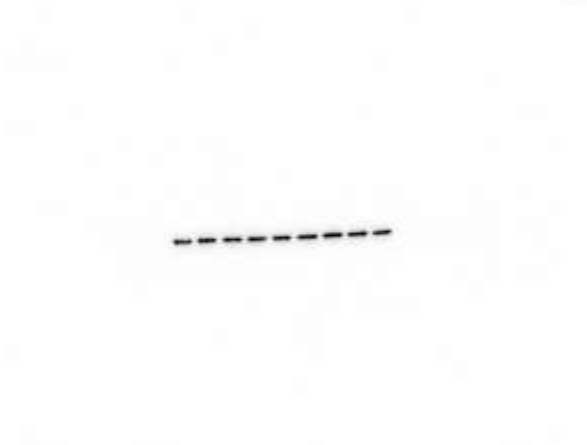

**Figure 8A**

**Figure 6G**

**GPX4**

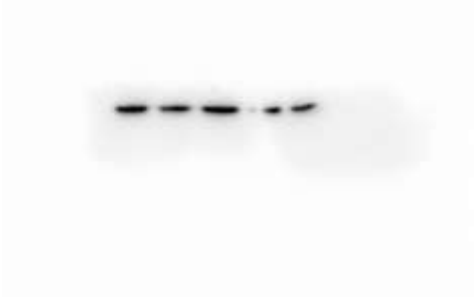

**xCT**

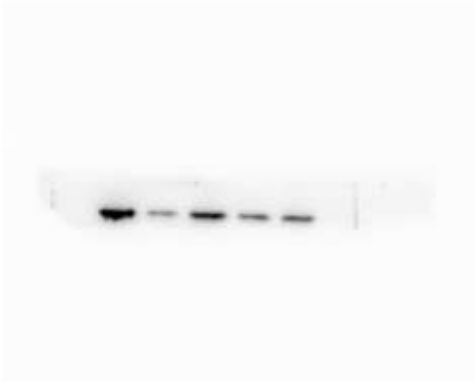

**β-actin**

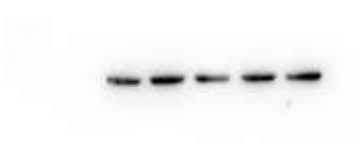

**Input: NRF2**

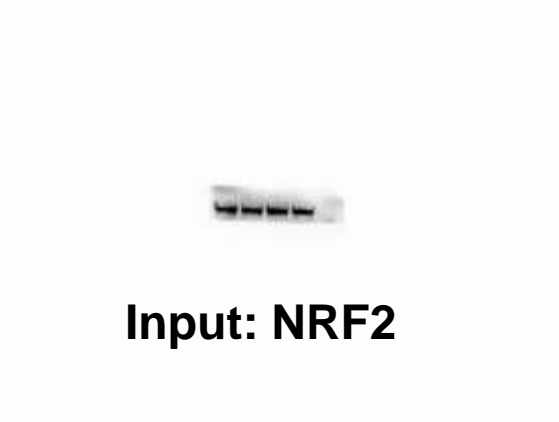

**KEAP1**

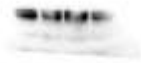

**β-actin**

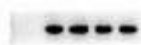

**IB: KEAP1**

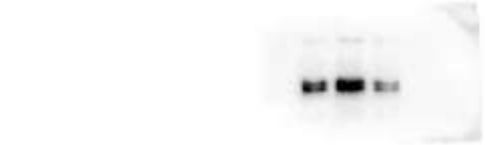

**IP: NRF2**

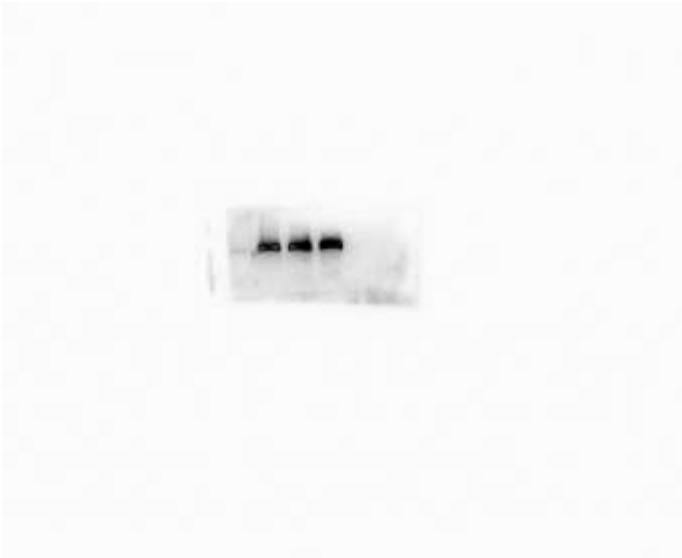

**Figure 8F**

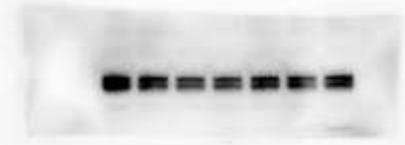

**KEAP1**

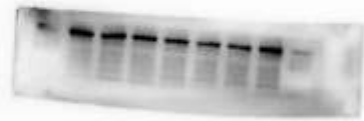

**Input: NRF2**

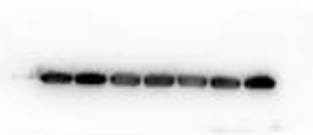

**$\beta$ -actin**

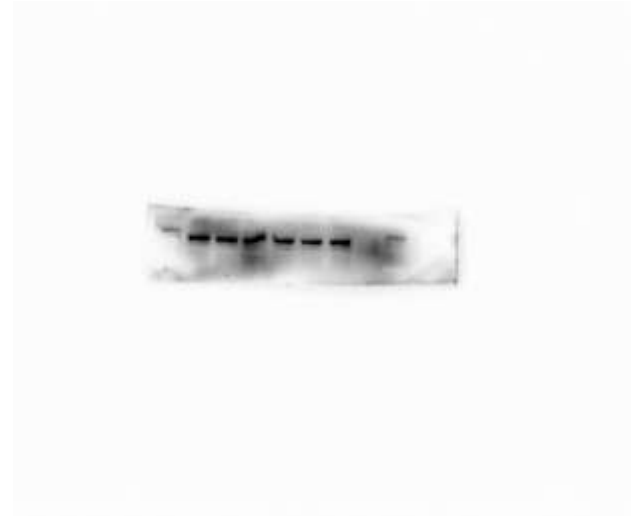

**IP: NRF2**

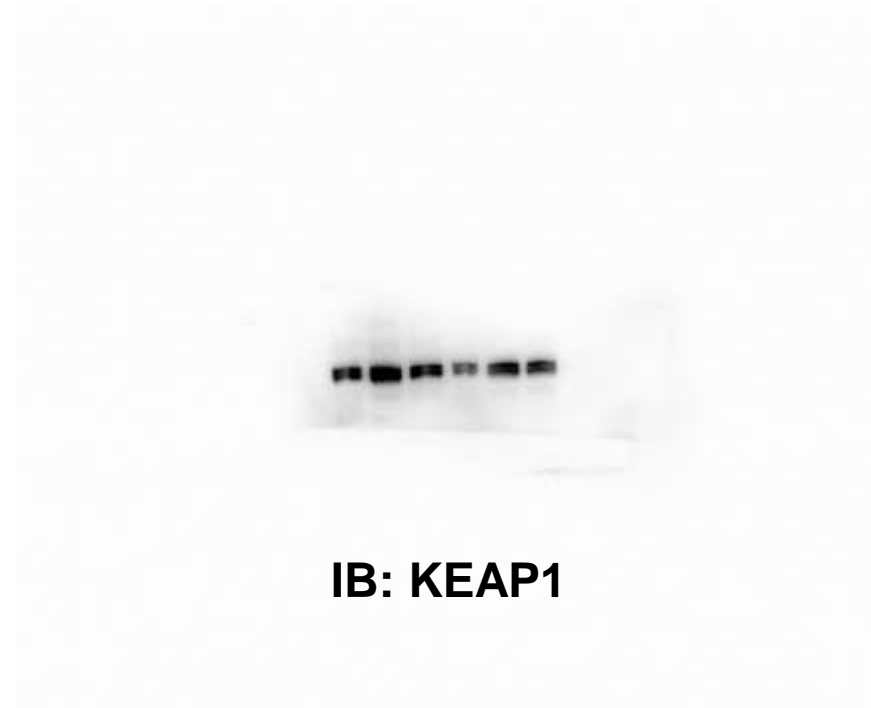

**IB: KEAP1**

**Figure 8H**

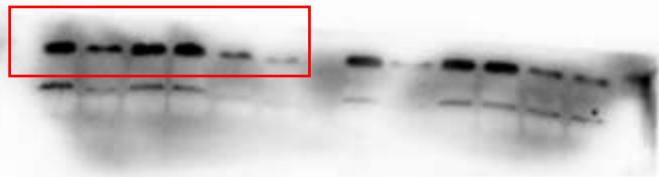

**NRF2**

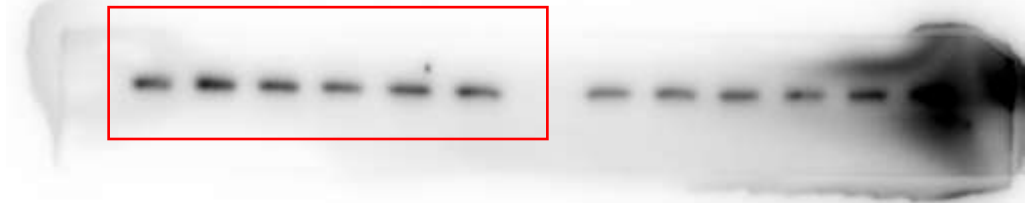

**Histone H3**

**Figure 9E**

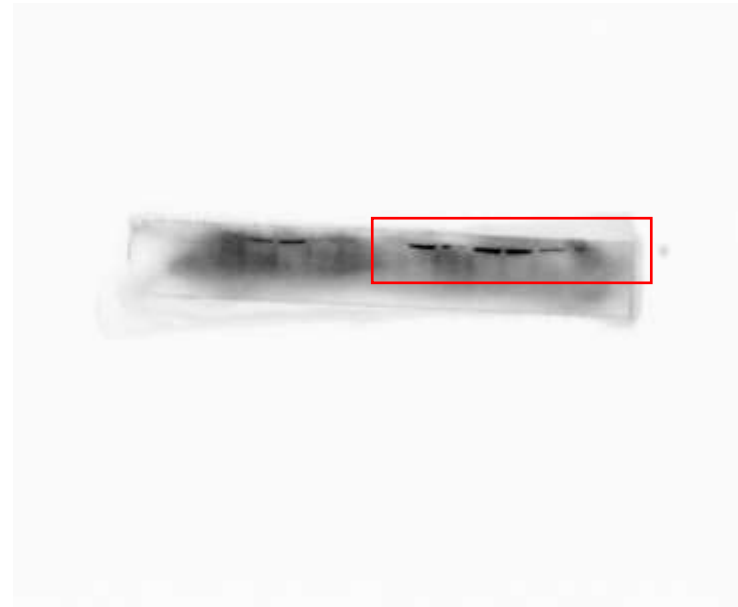

**xCT**

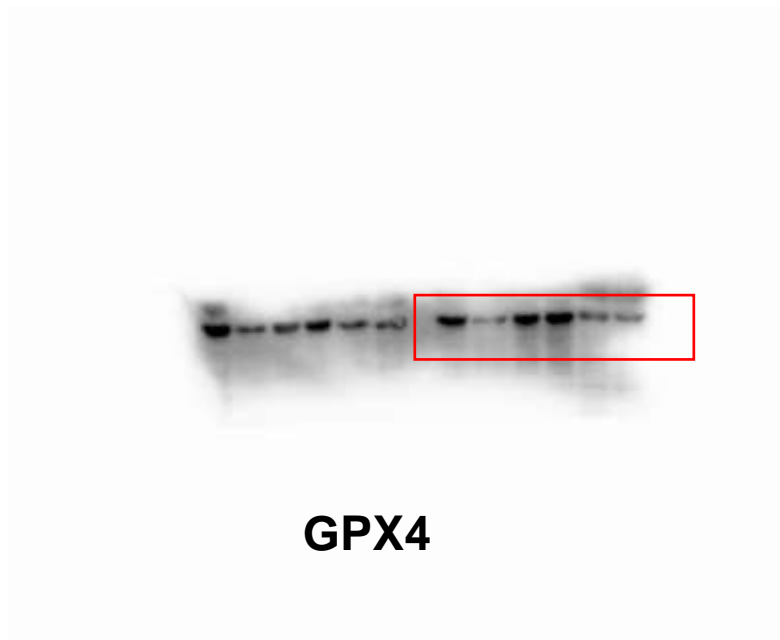

**GPX4**

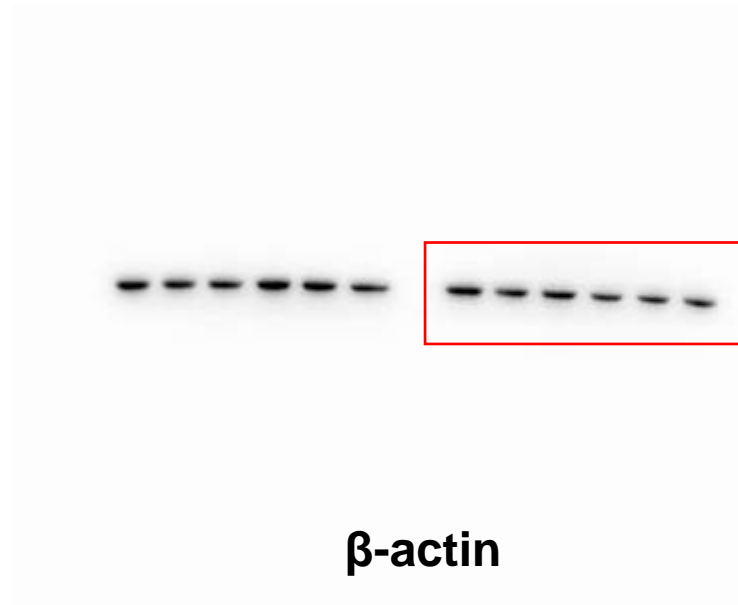

**$\beta$ -actin**

**Figure 11H**

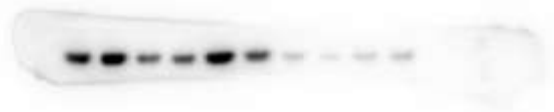

**GPX4**

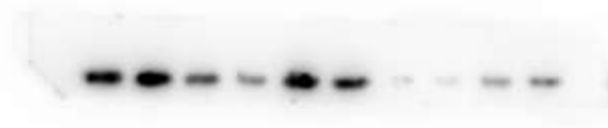

**xCT**

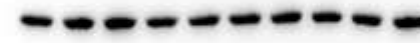

**$\beta$ -actin**

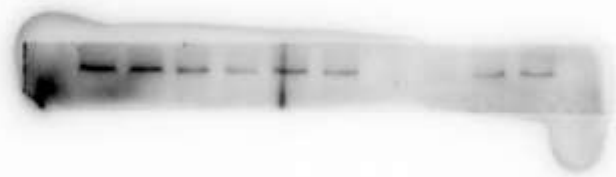

**NRF2**

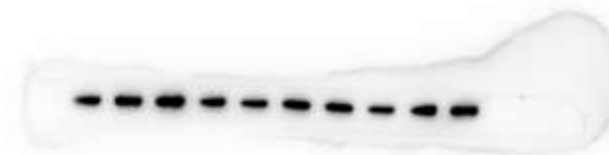

**Histone H3**

**Supplemental Figure 4A**      **Supplemental Figure 4C**

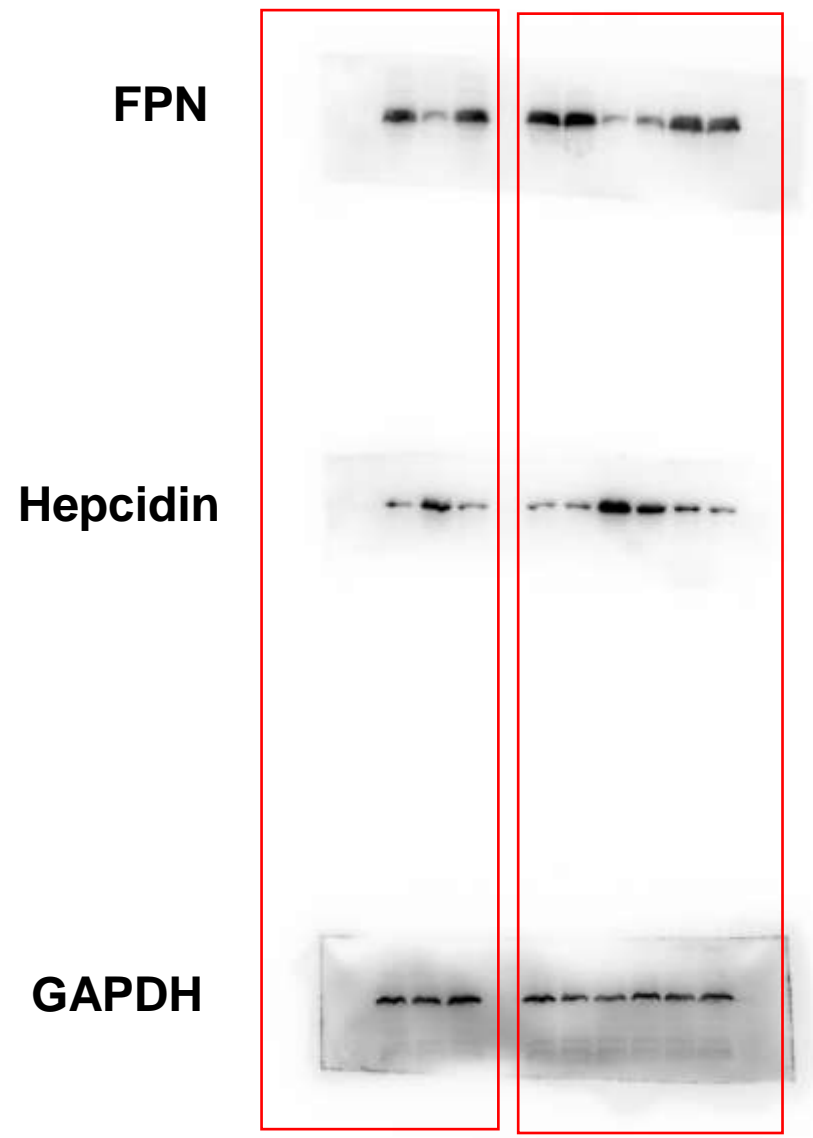



**Supplemental  
Figure 6C**

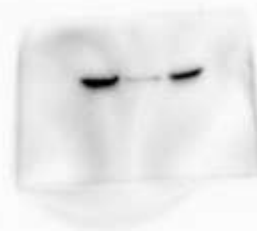

**GPX4**

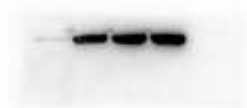

**$\beta$ -actin**

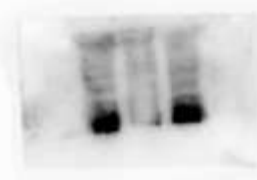

**xCT**

**Supplemental  
Figure 8A**

**$\beta$ -actin**

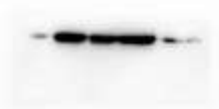

**Cle-caspase3**

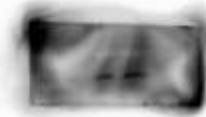

**Cle-caspase9**

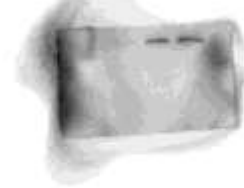

**Supplemental  
Figure 8D**

**GSDMD**

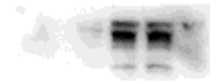

**$\beta$ -actin**

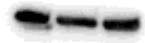

**Cle-caspase1**

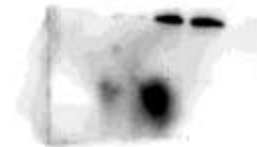

**Supplemental  
Figure 10D**

**GPX4**

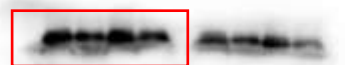

**xCT**

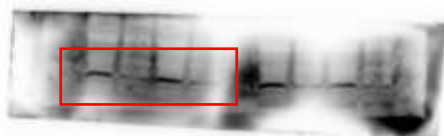

**$\beta$ -actin**

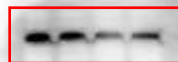

**Supplemental  
Figure 13D**

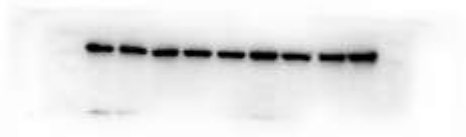

**β-actin**

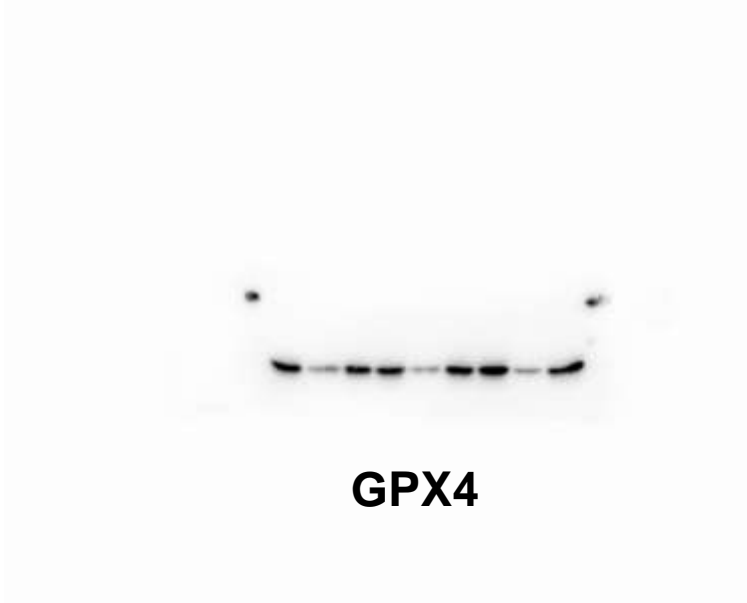

**GPX4**

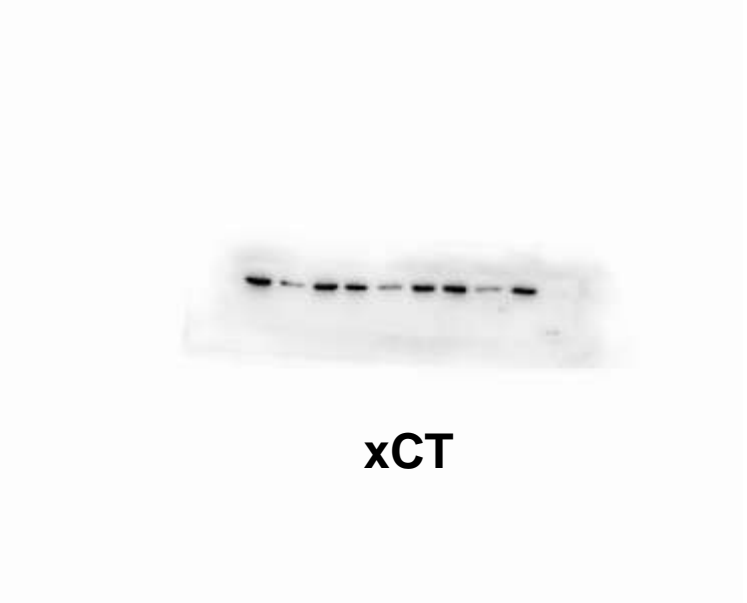

**xCT**

**Supplemental  
Figure 13G**

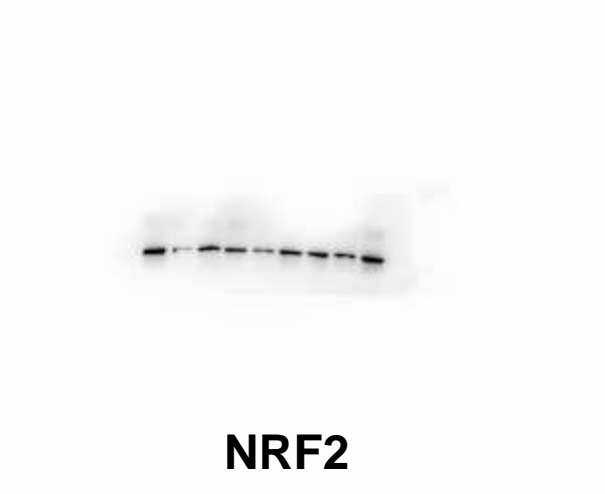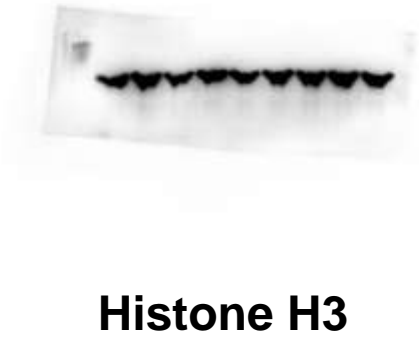

**Supplemental  
Figure 15C**

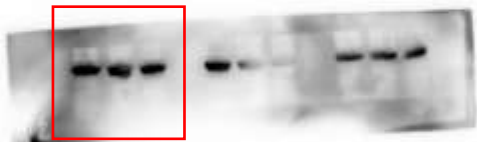

**$\beta$ -actin**

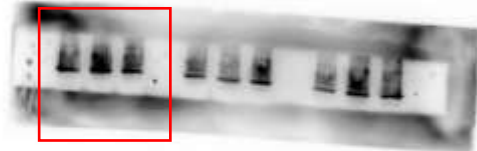

**P65**

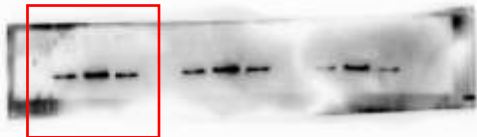

**p-P65**
